# Supplementary material
Source: publisher figshare collection journal article supplement (https://karger.figshare.com/ndownloader/files/6924374)
Supplement: Supplementary file 1 [file 6924374]

**Appendix Table 1**: **Beta coefficients and odds ratios for occult reduced eGFR in the risk score model among REGARDS participants**

| **Risk factor** | **Level** | **Raw beta coefficient** | **Odds Ratio (95%CI)** |
| --- | --- | --- | --- |
| Intercept |  | -1.5374 |  |
| Age (per year) | 45-69 | 0.0735 | 1.08 (1.07, 1.09) |
|  | 70-98 | 0.1015 | 1.11 (1.09, 1.12) |
|  |  |  |  |
| eGFRcreat (per 1ml/min/1.73m2) | 60-75 | -0.1034 | 0.90 (0.89, 0.91) |
|  | 75-90 | -0.0937 | 0.91 (0.90, 0.92) |
|  | >90 | -0.0653 | 0.94 (0.92, 0.95) |
|  |  |  |  |
| Black | No | 0 | reference |
|  | Yes | -0.1948 | 0.82 (0.74, 0.91) |
|  |  |  |  |
| Diabetes | No | 0 | reference |
|  | Yes | 0.3849 | 1.47 (1.32, 1.63) |
|  |  |  |  |
| Hypertension | No | 0 | reference |
|  | Yes | 0.4509 | 1.57 (1.42, 1.73) |
|  |  |  |  |
| CVD | No | 0 | reference |
|  | Yes | 0.2461 | 1.28 (1.15, 1.42) |
|  |  |  |  |
| BMI (per kg/m2) | Up to 40 | 0.0857 | 1.09 (1.08, 1.10) |
|  | 40+ | 0.1457 | 1.16 (1.13, 1.19) |
|  |  |  |  |
| Current Smoking | No | 0 | reference |
|  | Yes: Black | 0.9741 | 2.65 (2.19, 3.21) |
|  | Yes: White | 1.2435 | 3.47 (2.97, 4.06) |

All p values <0.001

C statistic = 0.8692, 95% bias-corrected CI: (0.8630, 0.8749); bias = 0.000344; Pseudo R2 = 0.30

Goodness-of-fit test passes: p = 0.08

CVD: cardiovascular disease; BMI: body mass index
